# Supplementary material for: Constructing Sheet-On-Sheet Structured Graphitic Carbon Nitride/Reduced Graphene Oxide/Layered MnO2 Ternary Nanocomposite with Outstanding Catalytic Properties on Thermal Decomposition of Ammonium Perchlorate
Source: PubMed Central journal article supplement (PMC5746940; doi:10.3390/nano7120450), 2017-12-15
Supplement: nanomaterials-07-00450-s001.pdf [file nanomaterials-07-00450-s001.pdf]

## Supporting Information

### Constructing sheet-on-sheet structured graphitic carbon nitride/reduced graphene oxide/layered MnO<sub>2</sub> ternary nanocomposite with enhanced catalytic properties

Jianhua Xu<sup>b,‡</sup>, Dongnan Li<sup>a,‡</sup>, Yu Chen<sup>c,‡</sup>, Linghua Tan<sup>a,b,\*</sup>, Wei Jiang<sup>a</sup>, Fang Li<sup>a</sup>, Bo Kou<sup>c</sup>

<sup>a</sup> National Special Superfine Power Engineering Research Center, Nanjing University of Science and Technology, Nanjing, 210094, P.R. China;

<sup>b</sup> School of Chemical Engineering, Nanjing University of Science and Technology, Nanjing, 210094, P.R. China;

<sup>c</sup> Jiangsu Key Laboratory of Advanced Structural Materials and Application Technology, School of Materials Engineering, Nanjing Institute of Technology, Nanjing, 211167, P.R. China

<sup>‡</sup> These authors contributed equally to this work

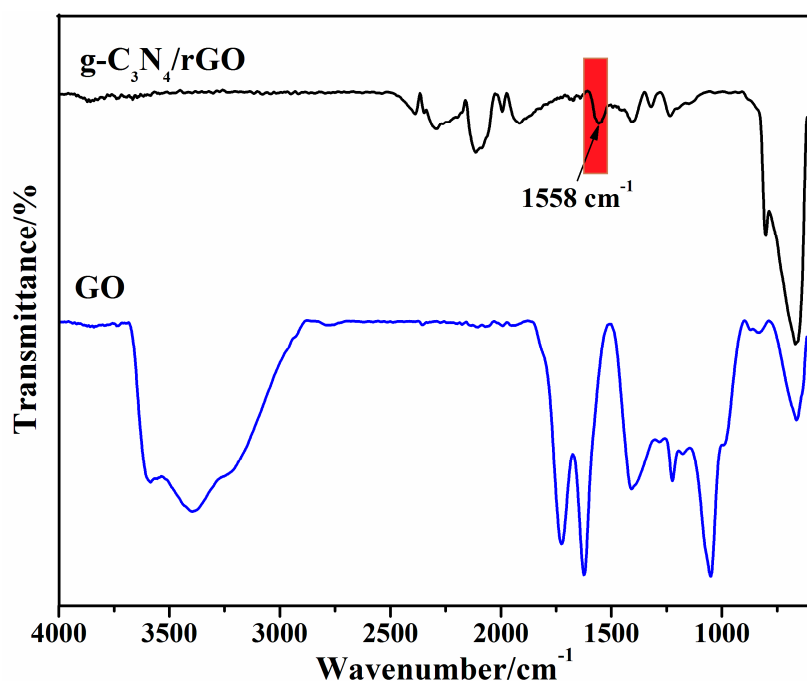

**Figure S1** FT-IR curves of the g-C<sub>3</sub>N<sub>4</sub>/rGO nanocomposite

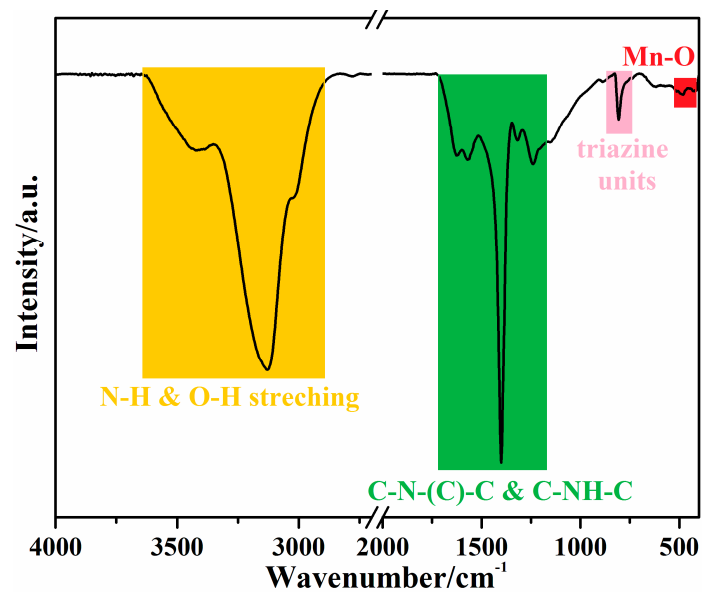

**Figure S2.** FT-IR spectrum of the g-C<sub>3</sub>N<sub>4</sub>/rGO/MnO<sub>2</sub> Ternary Nanocomposite.
